# Supplementary material for: Spin-canting magnetization in 3D metal organic frameworks based on strip-shaped Δ-chains
Source: Royal Society of Chemistry journal article supplement (doi:10.1039/c5ra15937g), 2015-01-01
Supplement: c5ra15937g1.pdf [file c5ra15937g1.pdf]

## Spin-canting magnetization in 3D metal organic frameworks based on strip-shaped $\Delta$ -chains

Xiu-Mei Zhang\*, Peng Li, Wei Gao and Jie-Ping Liu

\*College of Chemistry and Materials Science, Huaibei Normal University, Anhui

235000, China [zhangxiumeilb@126.com](mailto:zhangxiumeilb@126.com)

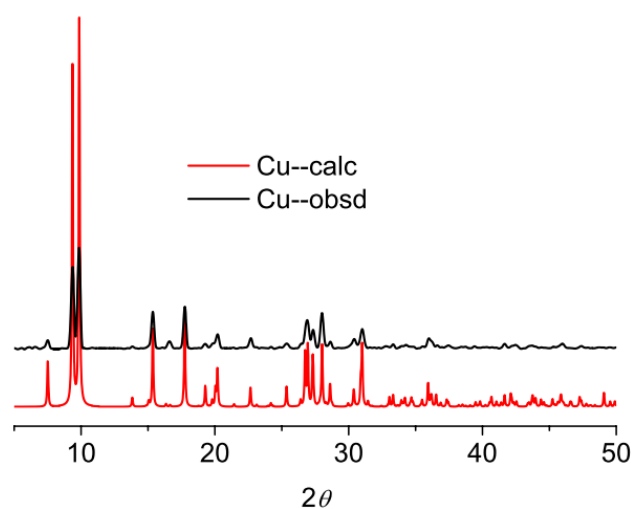

**Fig. S1.** Comparison of the XRD patterns measured for **1** (black) and that calculated from the single-crystal data of **1** (red).

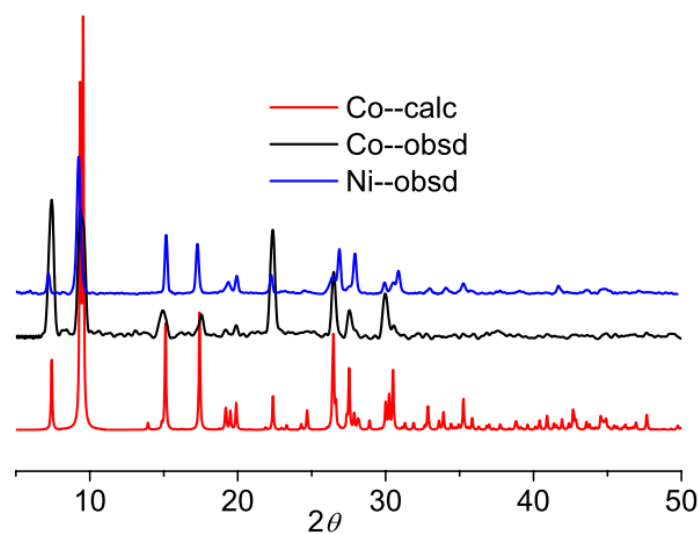

**Fig. S2.** Comparison of the XRD pattern measured for **2** (black) and **3** (blue) with that

calculated from the single-crystal data of **1** (red).

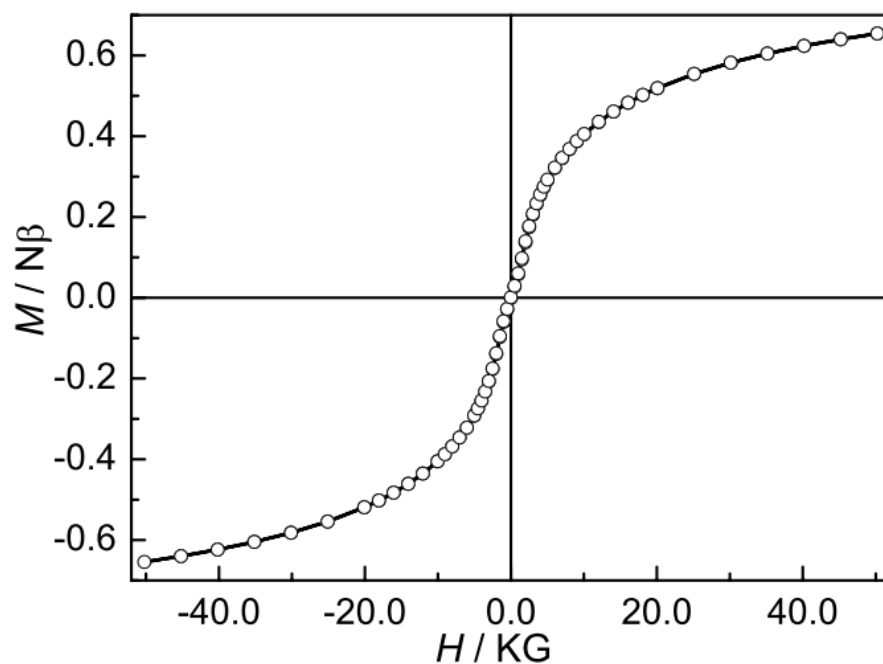

**Fig.S3.** Hysteresis loop of **1** at 2 K.

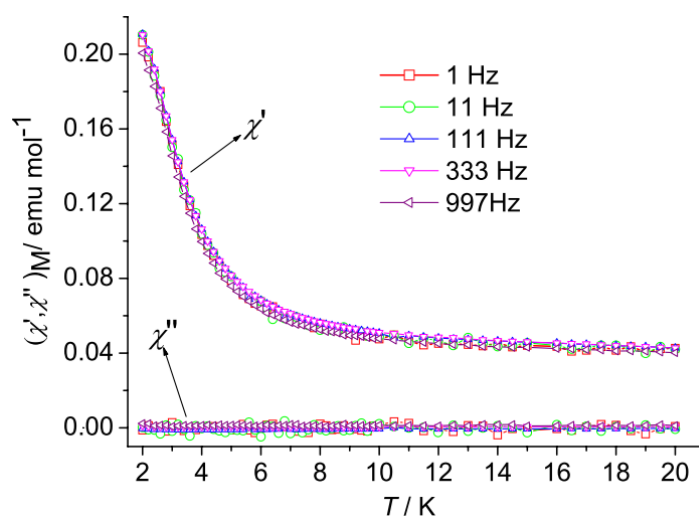

**Fig. S4.**  $\chi'(T)$  and  $\chi''(T)$  plot for **2** at frequencies 1, 11, 111, 333 and 997 Hz with  $H_{dc} = 0$  and  $H_{ac} = 3.0$  Oe.

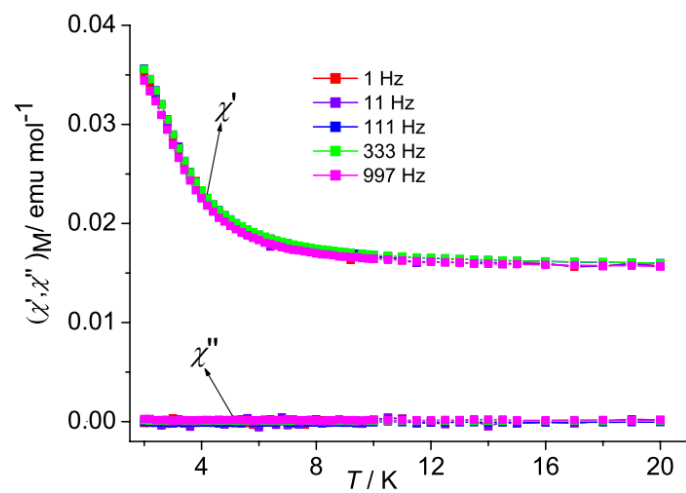

**Fig. S5.**  $\chi'(T)$  and  $\chi''(T)$  plot for **3** at frequencies 1, 11, 111, 333 and 997 Hz with  $H_{dc} = 0$  and  $H_{ac} = 3.0$  Oe.
